# Supplementary material
Source: publisher figshare collection journal article supplement (https://acs.figshare.com/ndownloader/files/5766387)
Supplement: Supplementary file 1 [file 5766387]

## Supporting Information

Table 1

Calculated  $^2J_{C1,O1,C4'}$  Values<sup>a</sup> in Geometrically-Optimized **1-4**

| Disaccharide | $^2J_{C1,O1,C4'}$ | $\phi^b$ | $\psi^c$ | $\angle_{C1-O1-C4'}$ | Energy <sup>d</sup> |
|--------------|-------------------|----------|----------|----------------------|---------------------|
| <b>1</b> 60R | - 1.9             | 43.4     | 21.7     | 115.4°               | 0.1                 |
| <b>1</b> 60S | - 2.0             | 47.5     | -17.1    | 116.3°               | 0.0                 |
| <b>1</b> AP  | - 2.4             | 31.9     | 170.7    | 118.9°               | 2.6                 |
| <b>2</b> 60S | - 2.1             | 31.7     | -25.5    | 118.3°               | 0.0                 |
| <b>2</b> AP  | - 2.1             | 17.6     | 179.6    | 119.4°               | 2.4                 |
| <b>3</b> 60S | - 2.1             | 43.8     | -19.4    | 116.9°               | 0.0                 |
| <b>3</b> AP  | - 2.8             | 51.9     | -159.6   | 120.1°               | 3.2                 |
| <b>4</b> 60S | - 2.3             | 32.0     | -22.1    | 118.7°               | 0.0                 |
| <b>4</b> AP  | - 2.1             | 16.5     | -178.9   | 119.9°               | 2.8                 |

<sup>a</sup>In Hz; *uncorrected* computed values. <sup>b</sup>Defined as H1-C1-O1-C4'. <sup>c</sup>Defined as C1-O1-C4'-H4'. <sup>d</sup>Relative energy within each group (in kcal/mol).

## Supporting Information

Table 2

Calculated  $^2J_{C1,O1,C4'}$  Values<sup>a</sup> in  $\psi$ -Constrained **1**

| Disaccharide | $^2J_{C1,O1,C4'}$ | $\phi^b$ | $\psi^c$ | $\angle_{C1-O1-C4'}$ | Energy <sup>d</sup> |
|--------------|-------------------|----------|----------|----------------------|---------------------|
| <b>1</b> 60  | -2.4              | 54.9°    | 60°      | 117.3°               | 1.5                 |
| <b>1</b> 80  | -2.5              | 58.1°    | 80°      | 118.2°               | 2.4                 |
| <b>1</b> 110 | -2.8              | 47.6°    | 110°     | 120.6°               | 4.4                 |
| <b>1</b> 130 | -2.9              | 43.8°    | 130°     | 121.0°               | 4.6                 |
| <b>1</b> 150 | -2.7              | 38.1°    | 150°     | 119.5°               | 3.4                 |

<sup>a</sup>In Hz; *uncorrected* computed values. <sup>b</sup>Defined as H1-C1-O1-C4'. <sup>c</sup>Defined as C1-O1-C4'-H4'; held constant in the calculation (all other structural parameters were optimized).

<sup>d</sup>Relative to the (most stable) 60S geometry of **1** (see Table 1).
